# Supplementary material
Source: Research Square preprint supplement (doi:10.21203/rs.3.rs-10100852/v1)
Supplement: Supplementary file 1 [file 6c1d662a54660402d0094713.docx]

**Supplementary Materials**

Nocturnal UTCI Heat Duration and Next-Day Active-Mobility Use: A Behavior-Day Monitoring Framework

International Journal of Biometeorology

Authors: Kang Li, Kui Ma, Huitian Shao, Zongli Xu, and Hao Ding

Corresponding author: Kang Li

Dongshin University, Naju-si, Jeollanam-do, Republic of Korea

Email: likang3645@gmail.com

# **Supplementary Figures**


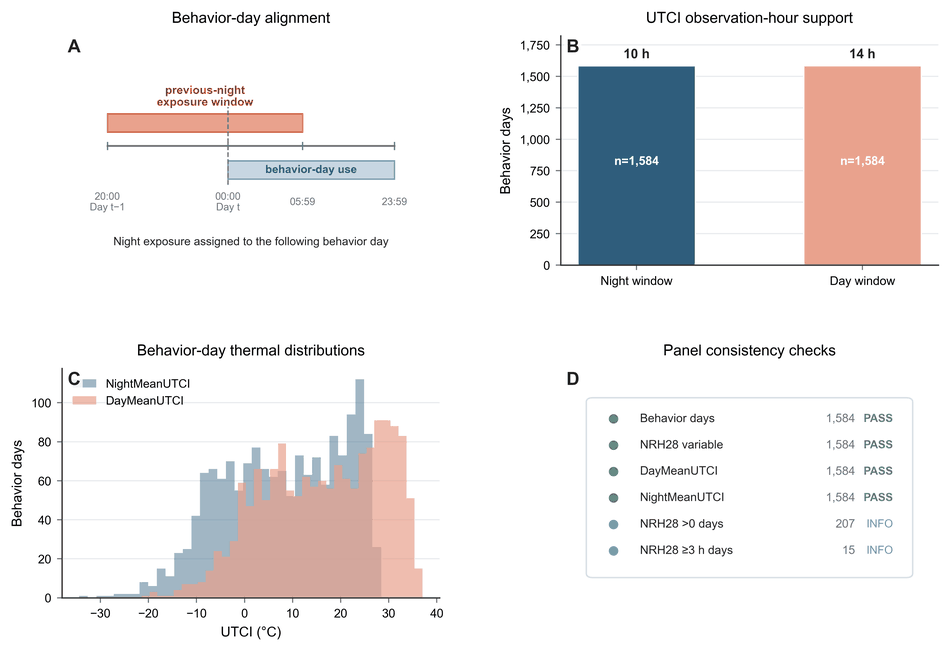


*Figure S1. UTCI reconstruction and behavior-day alignment checks. Panel A illustrates how previous-night exposure from 20:00 on day t−1 to 05:59 on day t was assigned to the following behavior day. Panel B summarizes hourly UTCI observation support for the night and day windows. Panel C shows the distributions of nighttime and daytime UTCI values used to construct thermal exposure and control variables. Panel D reports reconstruction-to-panel consistency checks for the derived analysis variables. Panel B uses the nominal window lengths; Table S2 reports date-specific minimum and maximum observation-hour support.*


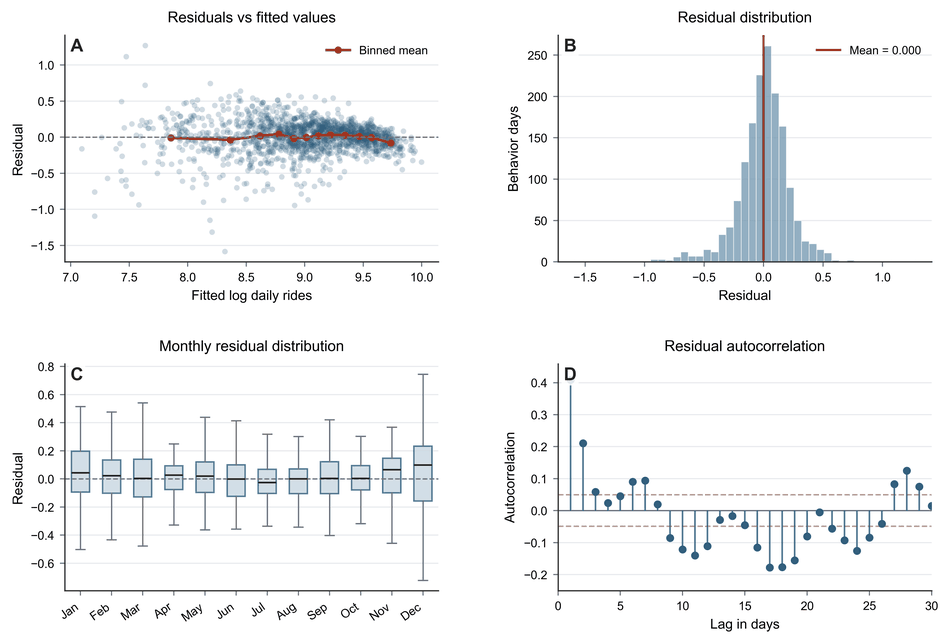


*Figure S2. Residual diagnostics for the main fixed-effects model. Panel A shows residuals against fitted log daily rides with a binned mean line. Panel B shows the residual distribution. Panel C summarizes monthly residual distributions. Panel D shows the autocorrelation function of model residuals up to 30 days; dashed lines indicate approximate 95% white-noise bounds. The presence of residual autocorrelation supports the use of Newey-West HAC standard errors.*


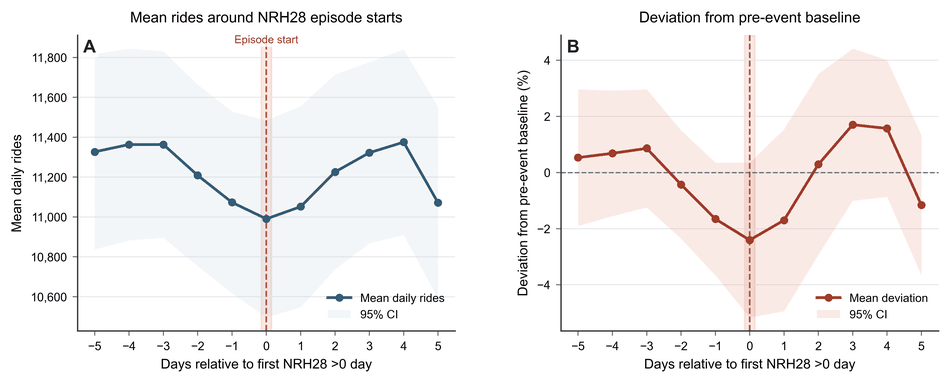


*Figure S3. Descriptive episode-centered demand trajectories around first NightRiskHours_28 days in heat-risk episodes. Panel A shows mean daily rides from five days before to five days after the first behavior day with NightRiskHours_28 >0 in each heat-risk episode. Panel B shows percent deviation from the pre-event baseline, defined as the mean rides during days −5 to −1 within each episode window. Shaded bands indicate 95% confidence intervals. These trajectories are descriptive diagnostics and should not be interpreted as causal event-study estimates.*


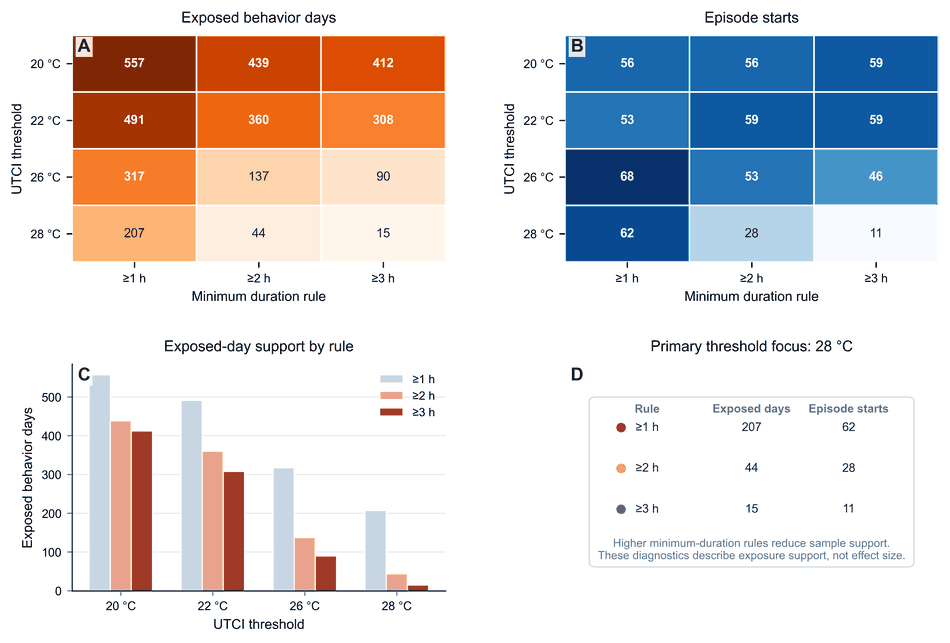


*Figure S4. Episode-definition sensitivity across UTCI thresholds and minimum-duration rules. Panel A shows the number of exposed behavior days under alternative UTCI thresholds and minimum-duration rules. Panel B shows the corresponding number of episode starts, defined as exposed days preceded by non-exposed days. Panel C displays exposed-day support by threshold and minimum-duration rule. Panel D focuses on the primary 28 °C threshold. These diagnostics describe exposure support under alternative episode definitions and should not be interpreted as effect-size estimates.*


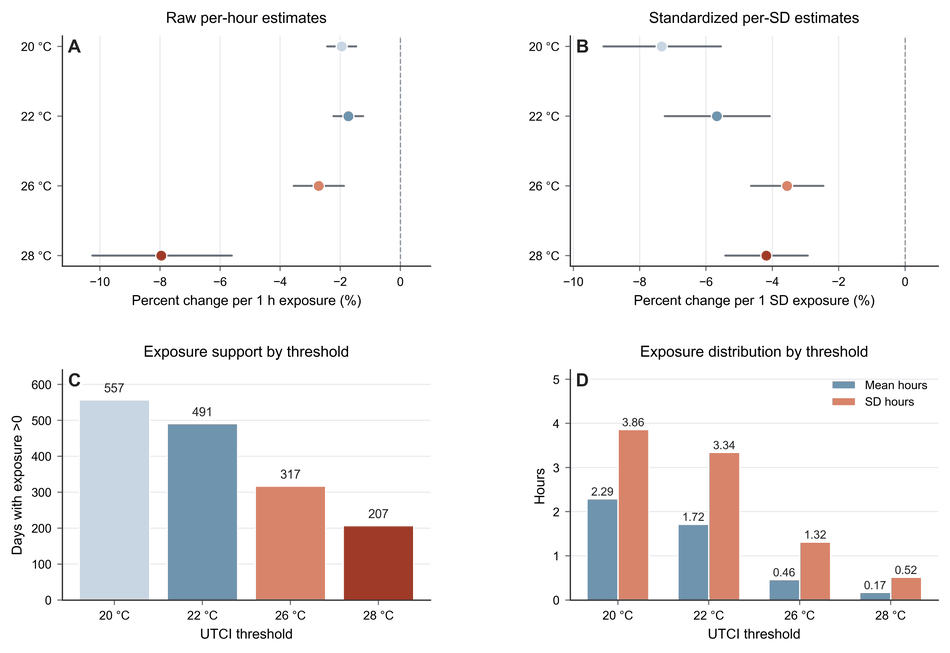


*Figure S5. Standardized threshold diagnostics for NightRiskHours indicators. Panel A shows raw per-hour estimates across UTCI thresholds. Panel B shows standardized estimates for one standard-deviation increases in each NightRiskHours indicator. Panel C reports the number of behavior days with nonzero exposure under each threshold. Panel D summarizes the mean and standard deviation of each exposure indicator. Higher UTCI thresholds identify stronger and sparser nocturnal heat-risk states; therefore, raw per-hour and standardized estimates should not be interpreted interchangeably.*


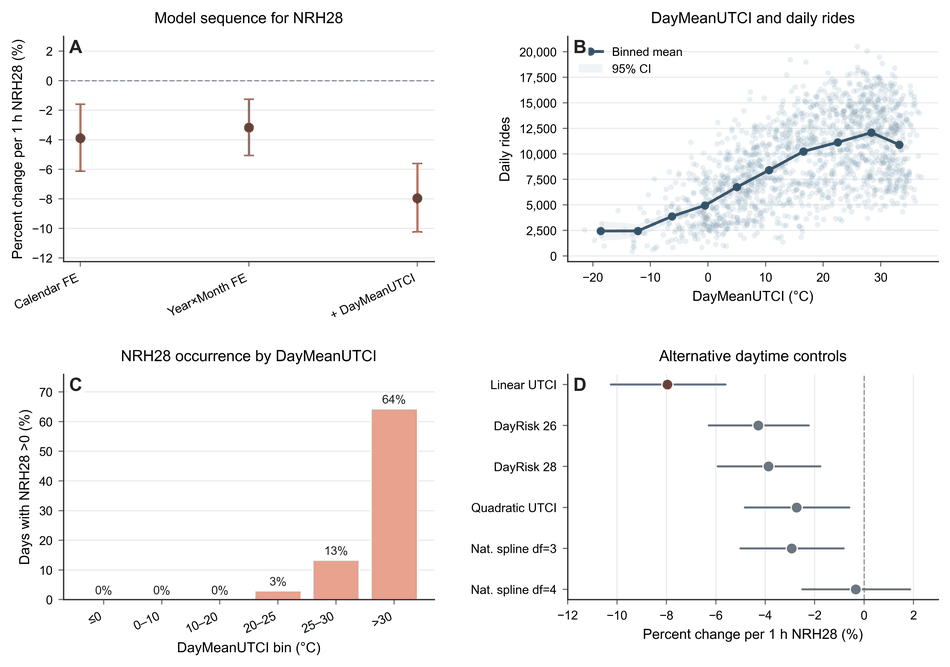


*Figure S6. DayMeanUTCI suppression and nonlinear-control diagnostics. Panel A shows the model sequence for NightRiskHours_28 before and after adjusting for daytime thermal background. Panel B shows the descriptive relationship between DayMeanUTCI and daily bikeshare use. Panel C shows the share of behavior days with NightRiskHours_28 >0 across DayMeanUTCI bins. Panel D compares alternative daytime heat-control specifications, including linear UTCI, daytime risk-hour controls, quadratic UTCI, and natural spline specifications. The diagnostic shows that the NightRiskHours_28 estimate changed after adding linear DayMeanUTCI and was attenuated under more flexible daytime-control specifications.*


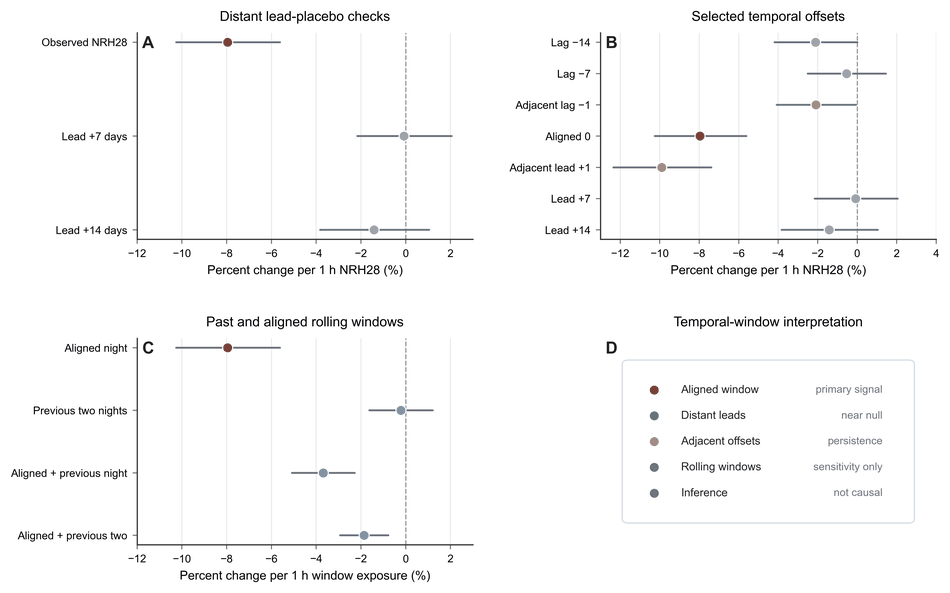


*Figure S7. Lag/lead temporal-window diagnostics for NightRiskHours_28. Panel A compares the correctly aligned NightRiskHours_28 estimate with distant future lead-placebo assignments at +7 and +14 days. Panel B summarizes selected temporal offsets, distinguishing the aligned exposure from adjacent and distant lag/lead assignments. Panel C compares the primary aligned night with past and aligned rolling-window definitions. Panel D summarizes the interpretation of the diagnostics. Distant future leads were close to null, whereas adjacent offsets may reflect persistence within the same heat episode. These diagnostics evaluate temporal alignment and should not be interpreted as causal event-study estimates or individual-level mechanism tests.*


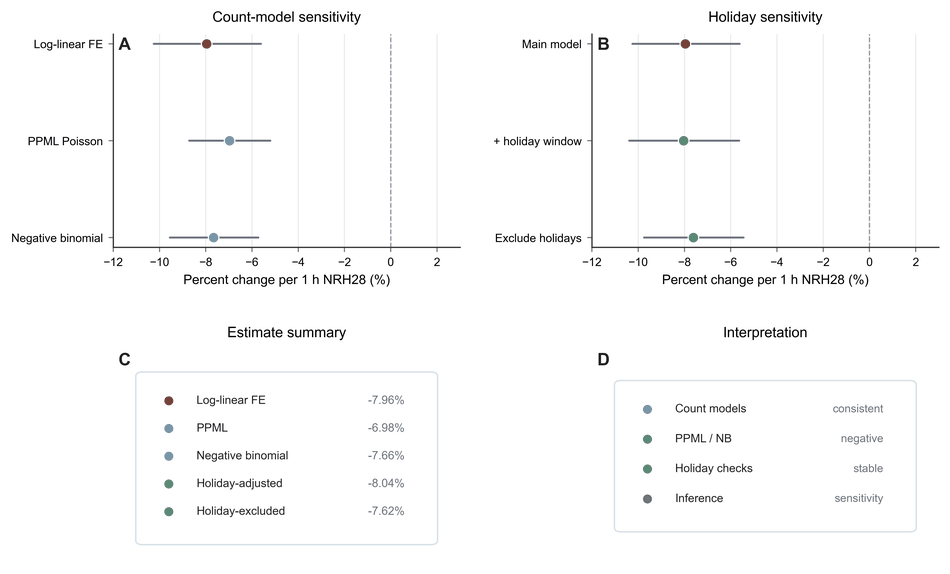


*Figure S8. Count-model and holiday sensitivity diagnostics. Panel A compares the main log-linear fixed-effects estimate with PPML Poisson and negative-binomial count-model specifications. Panel B reports holiday-related sensitivity checks, including a federal holiday ±1 day window indicator and exclusion of the federal holiday ±1 day window. Panel C summarizes the estimated percent changes across these checks. Panel D provides a compact interpretation summary. Under the operational linear daytime-control specification, the diagnostics indicate that the negative NightRiskHours_28 association was not driven by the log-transformed outcome scale or holiday-window handling.*


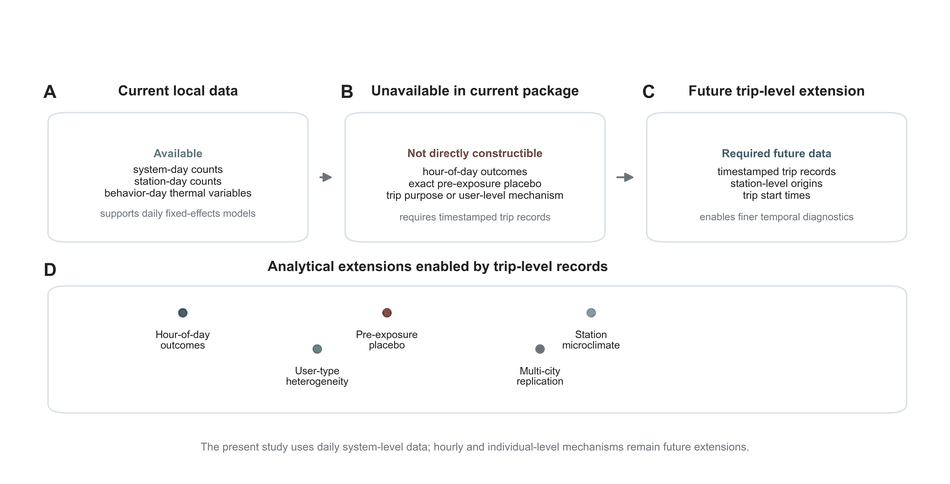


*Figure S9. Data limitation and future trip-level extension. Panel A summarizes the local analysis data available for the present study, including daily system-level and station-day counts. Panel B identifies analyses that could not be constructed from the supplied local package, including hour-of-day outcomes and exact pre-exposure outcome placebo tests. Panel C summarizes the trip-level timestamped data required for future extension. Panel D shows analytical extensions that would become possible with trip-level records, including hour-of-day outcomes, exact pre-exposure placebo tests, station-level microclimate linkage, user-type heterogeneity, and multi-city replication. The present study should therefore be interpreted as daily system-level evidence rather than individual-level mechanism evidence.*

# **Supplementary Tables**

**Table S1. Variable construction and behavior-day alignment rules**

| **Component** | **Variable** | **Operational definition** | **Unit / scale** | **Alignment rule** | **Used in analyses** |
| --- | --- | --- | --- | --- | --- |
| Outcome | rides_total | Total daily Capital Bikeshare pickups aggregated across stations | rides/day | Behavior day t | Descriptive and regression analyses |
| Outcome | log_total | Natural log of one plus total daily rides: log(1 + rides_total) | log scale | Behavior day t | Fixed-effects models |
| Nocturnal heat exposure | NightRiskHours_20 | Number of hours in the previous-night window with UTCI ≥20 °C | hours/night | 20:00 Day t−1 to 05:59 Day t; assigned to behavior day t | Threshold comparator |
| Nocturnal heat exposure | NightRiskHours_22 | Number of hours in the previous-night window with UTCI ≥22 °C | hours/night | 20:00 Day t−1 to 05:59 Day t; assigned to behavior day t | Threshold comparator |
| Nocturnal heat exposure | NightRiskHours_26 | Number of hours in the previous-night window with UTCI ≥26 °C | hours/night | 20:00 Day t−1 to 05:59 Day t; assigned to behavior day t | Threshold comparator |
| Nocturnal heat exposure | NightRiskHours_28 | Number of hours in the previous-night window with UTCI ≥28 °C | hours/night | 20:00 Day t−1 to 05:59 Day t; assigned to behavior day t | Primary exposure |
| Daytime thermal control | DayMeanUTCI | Mean UTCI during 06:00–19:59 on the behavior day | °C | Behavior day t | Primary daytime thermal background control |
| Daytime thermal control | DayRiskHours_26 | Number of daytime hours with UTCI ≥26 °C | hours/day | 06:00–19:59 on behavior day t | Alternative daytime heat control |
| Daytime thermal control | DayRiskHours_28 | Number of daytime hours with UTCI ≥28 °C | hours/day | 06:00–19:59 on behavior day t | Alternative daytime heat control |
| Weather control | tp_mm_daily | ERA5 total daily precipitation | mm/day | Behavior day t | Weather control |
| Calendar control | dow | Day-of-week indicator | categorical | Behavior day t | Temporal fixed effect |
| Calendar control | year_month | Year-by-month indicator | categorical | Behavior day t | Seasonal and long-run temporal fixed effect |
| Period control | covid_period | Pandemic-period background indicator | categorical | Behavior day t | Period background control |
| Placebo exposure | NightRiskHours_28_lead7 | NightRiskHours_28 shifted 7 days into the future | hours/night | Future exposure assigned to behavior day t | Lead placebo |
| Placebo exposure | NightRiskHours_28_lead14 | NightRiskHours_28 shifted 14 days into the future | hours/night | Future exposure assigned to behavior day t | Lead placebo |
| Holiday sensitivity | holiday_pm1 | Indicator for federal holidays and ±1 day windows | 0/1 | Behavior day t | Holiday sensitivity |

**Table S2. UTCI reconstruction and behavior-day panel support**

| **Metric** | **Value** |
| --- | --- |
| Raw UTCI source | ERA5-HEAT |
| Precipitation source | ERA5 |
| Original UTCI unit | Kelvin |
| Unit conversion | °C = K − 273.15 |
| Study period | 2020-05-01 to 2024-08-31 |
| Behavior days | 1,584 |
| Night window | 20:00 Day t−1 to 05:59 Day t |
| Day window | 06:00–19:59 Day t |
| NightObsHours mean/min/max | 10.000 / 9 / 11 |
| DayObsHours mean/min/max | 14.000 / 14 / 14 |
| NightRiskHours_20 >0 days | 557 |
| NightRiskHours_22 >0 days | 491 |
| NightRiskHours_26 >0 days | 317 |
| NightRiskHours_28 >0 days | 207 |
| NightRiskHours_28 ≥2 h days | 44 |
| NightRiskHours_28 ≥3 h days | 15 |
| NightRiskHours_28 maximum hours | 5.0 |

**Table S3. Fixed-effects model sequence and threshold-comparator estimates**

| **ID** | **Model** | **Term** | **Beta (95% CI)** | **Percent change (95% CI)** | **p** | **N** | **R²** |
| --- | --- | --- | --- | --- | --- | --- | --- |
| M1 | Calendar FE | NightRiskHours_28 | -0.0396 (-0.0632, -0.0161) | -3.89% (-6.13%, -1.59%) | <0.001 | 1,584 | 0.745 |
| M2 | Year×Month FE | NightRiskHours_28 | -0.0323 (-0.0520, -0.0126) | -3.18% (-5.07%, -1.25%) | 0.001 | 1,584 | 0.796 |
| M3 | Full model + DayMeanUTCI | NightRiskHours_28 | -0.0829 (-0.1081, -0.0578) | -7.96% (-10.25%, -5.61%) | <0.001 | 1,584 | 0.844 |
| T-20 | UTCI ≥20 °C night-risk hours | NightRiskHours_20 | -0.0197 (-0.0247, -0.0148) | -1.95% (-2.44%, -1.47%) | <0.001 | 1,584 | 0.845 |
| T-22 | UTCI ≥22 °C night-risk hours | NightRiskHours_22 | -0.0175 (-0.0225, -0.0124) | -1.73% (-2.22%, -1.24%) | <0.001 | 1,584 | 0.844 |
| T-26 | UTCI ≥26 °C night-risk hours | NightRiskHours_26 | -0.0275 (-0.0362, -0.0189) | -2.72% (-3.55%, -1.88%) | <0.001 | 1,584 | 0.843 |
| T-28 | UTCI ≥28 °C night-risk hours | NightRiskHours_28 | -0.0829 (-0.1081, -0.0578) | -7.96% (-10.25%, -5.61%) | <0.001 | 1,584 | 0.844 |

**Table S4. Sample and temporal fixed-effect sensitivity**

| **Specification** | **Percent change (95% CI)** | **p** | **N** | **Notes** |
| --- | --- | --- | --- | --- |
| Full sample | -7.96% (-10.25%, -5.61%) | <0.001 | 1,584 | Operational reference specification |
| Exclude 2020 | -7.57% (-9.96%, -5.11%) | <0.001 | 1,339 | Pandemic-period sensitivity |
| Exclude 2020–2021 | -7.61% (-10.02%, -5.14%) | <0.001 | 974 | Post-disruption sensitivity |
| May–September | -5.44% (-7.73%, -3.09%) | <0.001 | 735 | Warm-season sample |
| June–August | -3.18% (-5.18%, -1.13%) | 0.002 | 460 | Core-summer sample |
| Month + Year FE | -9.34% (-11.91%, -6.71%) | <0.001 | 1,584 | Alternative temporal FE |
| Year×Week FE | -7.02% (-9.60%, -4.37%) | <0.001 | 1,584 | Alternative temporal FE |

**Table S5. Categorical dose-response estimates for NightRiskHours_28**

| **Category** | **Category N** | **Beta (95% CI)** | **Percent change (95% CI)** | **p** |
| --- | --- | --- | --- | --- |
| 0 h (reference) | 1,377 | Reference | Reference | — |
| 1 h | 163 | -0.1338 (-0.1837, -0.0839) | -12.52% (-16.78%, -8.05%) | <0.001 |
| 2 h | 29 | -0.1417 (-0.2042, -0.0792) | -13.21% (-18.47%, -7.62%) | <0.001 |
| ≥3 h | 15 | -0.2599 (-0.3484, -0.1714) | -22.89% (-29.41%, -15.75%) | <0.001 |

**Table S6. Lead placebo diagnostics for NightRiskHours_28**

| **Model** | **Term** | **Percent change (95% CI)** | **p** | **N** | **Interpretation** |
| --- | --- | --- | --- | --- | --- |
| Observed NRH28 | NightRiskHours_28 | -7.96% (-10.25%, -5.61%) | <0.001 | 1,584 | Correctly aligned exposure |
| Lead +7 days | NightRiskHours_28_lead7 | -0.08% (-2.16%, 2.05%) | 0.944 | 1,577 | Future exposure placebo |
| Lead +14 days | NightRiskHours_28_lead14 | -1.42% (-3.82%, 1.05%) | 0.257 | 1,570 | Future exposure placebo |

**Table S7. Alternative daytime heat-control models**

| **Specification** | **Percent change (95% CI)** | **p** | **N** | **R²** |
| --- | --- | --- | --- | --- |
| Linear DayMeanUTCI control | -7.96% (-10.25%, -5.61%) | <0.001 | 1,584 | 0.844 |
| DayRiskHours_26 control | -4.28% (-6.29%, -2.24%) | <0.001 | 1,584 | 0.798 |
| DayRiskHours_28 control | -3.87% (-5.92%, -1.77%) | <0.001 | 1,584 | 0.796 |
| DayMeanUTCI quadratic control | -2.73% (-4.82%, -0.60%) | 0.012 | 1,584 | 0.860 |
| Natural spline DayMeanUTCI, df=3 | -2.94% (-5.01%, -0.82%) | 0.007 | 1,584 | 0.860 |
| Natural spline DayMeanUTCI, df=4 | -0.34% (-2.50%, 1.86%) | 0.759 | 1,584 | 0.863 |

*Interpretation. Alternative daytime heat-control specifications generally preserved the negative direction, although the estimate was attenuated and became non-significant under the most flexible natural-spline specification. The natural spline df = 4 estimate was -0.34% (95% CI: -2.50%, 1.86%; p = 0.759).*

**Table S8. Count-model and holiday sensitivity**

| **Module** | **Specification** | **Percent change (95% CI)** | **p** | **N** | **SE type / notes** |
| --- | --- | --- | --- | --- | --- |
| Count model | PPML Poisson | -6.98% (-8.93%, -4.98%) | <0.001 | 1,584 | Newey-West HAC, maxlags=7 |
| Count model | Negative binomial GLM | -7.67% (-9.89%, -5.40%) | <0.001 | 1,584 | Newey-West HAC, maxlags=7 |
| Holiday sensitivity | Add federal holiday and holiday ±1 day indicators | -8.05% (-10.40%, -5.63%) | <0.001 | 1,584 | Newey-West HAC, maxlags=7 |
| Holiday sensitivity | Exclude federal holiday ±1 day window | -7.62% (-9.75%, -5.44%) | <0.001 | 1,446 | Excluded 138 behavior days. |

**Table S9. Local data audit and enhanced-analysis status**

| **Analysis** | **Status** | **Current basis** | **Required future data** |
| --- | --- | --- | --- |
| Daily fixed-effects model | Completed | Daily behavior-day panel | Not applicable |
| Alternative daytime heat controls | Completed | Daily behavior-day panel | Not applicable |
| PPML and negative-binomial sensitivity | Completed | Daily behavior-day panel | Not applicable |
| Holiday sensitivity | Completed | Daily behavior-day panel plus federal holiday indicators | Not applicable |
| Lead placebo | Completed | Lead NightRiskHours_28 variables in daily panel | Not applicable |
| Hourly outcome | Not completed from supplied local data | System-day / station-day aggregate counts only | Trip-level or hourly timestamped bikeshare data |
| Exact pre-exposure outcome placebo | Not completed from supplied local data | No Day t−1 06:00–19:59 ride counts in local package | Timestamped trip/hourly data for pre-exposure daytime use |

**Table S10. Incremental model diagnostics for thermal monitoring metrics.**

*These diagnostics evaluate the incremental model-fit contribution of NightRiskHours_28 relative to daytime and nighttime thermal summaries. They should not be interpreted as causal evidence for night-specific effects.*

**Table S10A. Thermal-variable correlation diagnostics.**

| **Variable pair** | **Pearson r** | **Spearman ρ** | **Interpretation** |
| --- | --- | --- | --- |
| NightRiskHours_28 vs DayMeanUTCI | 0.436 | 0.538 | Moderate overlap |
| NightRiskHours_28 vs NightMeanUTCI | 0.455 | 0.554 | Moderate overlap |
| NightRiskHours_28 vs NightMaxUTCI | 0.467 | 0.584 | Moderate overlap |
| DayMeanUTCI vs NightMeanUTCI | 0.916 | 0.929 | Very high overlap |
| DayMeanUTCI vs NightMaxUTCI | 0.913 | 0.928 | Very high overlap |
| NightMeanUTCI vs NightMaxUTCI | 0.983 | 0.980 | Near-equivalent continuous summaries |

*Note. NightRiskHours_28 showed moderate correlation with DayMeanUTCI and continuous nighttime summaries, whereas DayMeanUTCI, NightMeanUTCI, and NightMaxUTCI were highly correlated.*

**Table S10B. Variance inflation factor diagnostics.**

| **VIF set** | **Variable** | **VIF** | **Interpretation** |
| --- | --- | --- | --- |
| Daytime + duration | NightRiskHours_28 | 1.24 | Low collinearity |
| Daytime + duration | DayMeanUTCI | 1.24 | Low collinearity |
| Daytime + duration + mean/max | NightRiskHours_28 | 1.28 | Low collinearity |
| Daytime + duration + mean/max | DayMeanUTCI | 7.76 | High collinearity with continuous summaries |
| Daytime + duration + mean/max | NightMeanUTCI | 34.76 | Severe collinearity |
| Daytime + duration + mean/max | NightMaxUTCI | 31.05 | Severe collinearity |
| Broad thermal | DayRiskHours_26 | 19.40 | Severe collinearity |
| Broad thermal | DayRiskHours_28 | 15.88 | Severe collinearity |

*Note. The largest VIF values occurred among continuous daytime and nighttime thermal summaries and daytime risk-hour controls. NightRiskHours_28 itself showed low VIF in the tested sets, indicating that attenuation under flexible daytime controls was not simply a variance-inflation artifact.*

**Table S10C. Incremental model diagnostics.**

| **ID** | **Model** | **Added** | **R²** | **ΔR²** | **Partial R²** | **AIC** | **BIC** | **ΔAIC** | **Estimate** | **p** |
| --- | --- | --- | --- | --- | --- | --- | --- | --- | --- | --- |
| M1 | DayMean | DayMean | 0.8405 | 0.0453 | 0.2213 | -83.75 | 238.31 | -394.24 | 2.32% | <0.001 |
| M2 | Day+NRH28 | NRH28 | 0.8439 | 0.0034 | 0.0216 | -116.34 | 211.09 | -32.59 | -7.96% | <0.001 |
| M3 | Day+NMean | NMean | 0.8407 | 0.0003 | 0.0016 | -84.37 | 243.06 | -0.62 | -0.23% | 0.232 |
| M4 | Day+NMax | NMax | 0.8405 | 0.0000 | 0.0000 | -81.79 | 245.64 | 1.96 | -0.02% | 0.882 |
| M5 | Day+NMean+NRH28 | NRH28 | 0.8440 | 0.0033 | 0.0206 | -115.36 | 217.44 | -30.99 | -7.82% | <0.001 |
| M6 | Day+NMax+NRH28 | NRH28 | 0.8440 | 0.0035 | 0.0219 | -114.90 | 217.90 | -33.11 | -8.11% | <0.001 |
| F2 | Spline3+NRH28 | NRH28 | 0.8602 | 0.0004 | 0.0029 | -288.69 | 44.10 | -2.63 | -2.94% | 0.0067 |
| F4 | Spline4+NRH28 | NRH28 | 0.8625 | 0.0000 | 0.0000 | -313.30 | 24.86 | 1.95 | -0.34% | 0.759 |

*Note. Day denotes linear DayMeanUTCI; NMean and NMax denote NightMeanUTCI and NightMaxUTCI; Spline3 and Spline4 denote natural-spline DayMeanUTCI specifications with 3 and 4 degrees of freedom. The natural-spline DayMeanUTCI df=4 baseline had substantially lower AIC and BIC than the linear DayMeanUTCI baseline; therefore, the linear estimate is interpreted as an operational reference specification rather than as a best-fitting independent night-specific effect.*

**Table S10D. Duration versus mean/max thermal-summary comparison.**

| **ID** | **Thermal spec.** | **Added** | **ΔR²** | **Partial R²** | **ΔAIC** | **Estimate** | **p** |
| --- | --- | --- | --- | --- | --- | --- | --- |
| D1 | DayMean only | DayMean | 0.0453 | 0.2213 | -394.24 | 2.32% | <0.001 |
| D4 | NRH28 only | NRH28 | 0.0005 | 0.0026 | -2.16 | -3.18% | 0.0013 |
| D2 | NMean only | NMean | 0.0167 | 0.0814 | -132.41 | 1.37% | <0.001 |
| D3 | NMax only | NMax | 0.0157 | 0.0768 | -124.57 | 1.29% | <0.001 |
| A3 | Day+NRH28 | NRH28 | 0.0034 | 0.0216 | -32.59 | -7.96% | <0.001 |
| A1 | Day+NMean | NMean | 0.0003 | 0.0016 | -0.62 | -0.23% | 0.232 |
| A2 | Day+NMax | NMax | 0.0000 | 0.0000 | 1.96 | -0.02% | 0.882 |
| A4 | Day+NMean+NRH28 | NRH28 | 0.0033 | 0.0206 | -30.99 | -7.82% | <0.001 |
| A5 | Day+NMax+NRH28 | NRH28 | 0.0035 | 0.0219 | -33.11 | -8.11% | <0.001 |

*Note. Day denotes DayMeanUTCI; NMean and NMax denote NightMeanUTCI and NightMaxUTCI. As a standalone thermal metric, NightRiskHours_28 explained less variation than DayMeanUTCI or continuous nighttime UTCI summaries. Its incremental value appeared after linear DayMeanUTCI adjustment and relative to nighttime mean or maximum summaries.*

**Table S10E. Same-form daytime and nighttime threshold-duration comparison.**

| **ID** | **Model** | **Added** | **ΔR²** | **Partial R²** | **AIC** | **BIC** | **ΔAIC** | **Estimate** | **p** |
| --- | --- | --- | --- | --- | --- | --- | --- | --- | --- |
| L1 | Day+DayRisk28 | DayRisk28 | 0.0117 | 0.0730 | -201.89 | 125.54 | -118.14 | -2.81% | <0.001 |
| L2 | Day+NRH28 | NRH28 | 0.0034 | 0.0216 | -116.34 | 211.09 | -32.59 | -7.96% | <0.001 |
| L3 | Day+DayRisk28+NRH28 | NRH28 | 0.0017 | 0.0113 | -217.83 | 114.97 | -15.94 | -5.68% | <0.001 |
| L4 | Day+NRH28+DayRisk28 | DayRisk28 | 0.0099 | 0.0632 | -217.83 | 114.97 | -101.49 | -2.63% | <0.001 |
| F1 | Spline4+DayRisk28 | DayRisk28 | 0.0004 | 0.0032 | -318.32 | 19.85 | -3.07 | 0.95% | 0.0058 |
| F2 | Spline4+NRH28 | NRH28 | 0.0000 | 0.0000 | -313.30 | 24.86 | 1.95 | -0.34% | 0.7593 |
| F3 | Spline4+DayRisk28+NRH28 | NRH28 | 0.0000 | 0.0001 | -316.45 | 27.09 | 1.87 | 0.54% | 0.6260 |
| F4 | Spline4+NRH28+DayRisk28 | DayRisk28 | 0.0004 | 0.0032 | -316.45 | 27.09 | -3.14 | 0.99% | 0.0039 |

*Note. DayRisk28 denotes DayRiskHours_28; NRH28 denotes NightRiskHours_28. Both are threshold-duration metrics. The comparison evaluates whether the NRH28 signal remains after accounting for same-form daytime threshold-duration exposure and flexible daytime thermal background. These diagnostics assess monitoring-model increment and should not be interpreted as causal evidence for night-specific effects.*
